# Supplementary material for: A broad-range variable-temperature solid state NMR spectral and relaxation investigation of the water state in Nafion 117
Source: Royal Society of Chemistry journal article supplement (doi:10.1039/c9cp05978d), 2021-01-01
Supplement: c9cp05978d1.pdf [file c9cp05978d1.pdf]

## Supporting Information

### Broad Range Variable-Temperature Solid State NMR Spectral and Relaxation Investigation of the Water State in Nafion 117

Ren-Hao Cheng<sup>a</sup>, Honghao Cai<sup>b</sup>, Yu-Ren Huang<sup>c</sup>, Zhong Chen<sup>d</sup>, Hsuan-Ying Chen<sup>e</sup>,  
Shangwu Ding<sup>a,\*</sup>

<sup>a</sup> Department of Chemistry and Center for Nanoscience and Nanotechnology, National Sun Yat-sen University, 70 Lien-Hai Road, Kaohsiung, 80424, Taiwan R.O.C.

<sup>b</sup> School of Science, Jimei University, Xiamen, China.

<sup>c</sup> Department of Applied Science, ROC Naval Academy, 669 Academy Road, Kaohsiung, Taiwan, R.O.C.

<sup>d</sup> Department of Electronic Science, Fujian Provincial Key Laboratory of Plasma and Magnetic Resonance, State Key Laboratory of Physical Chemistry of Solid Surfaces, Xiamen University, Xiamen, China

<sup>e</sup> Department of Medicinal and Applied Chemistry, Kaohsiung Medical University, 100, Shih-Chuan 1st Road, Kaohsiung, 80708, Taiwan

In this supplementary information, the variable temperature <sup>2</sup>H NMR spectra of fully hydrated pristine Nafion 117 and Nafion 117 samples substituted by lithium and sodium cations are presented. The narrow spectra (all smaller than 4 ppm) confirms that a significant portion of water remains unfrozen down to -60 °C. Note that because of a much smaller gyromagnetic ratio of <sup>2</sup>H than that of proton, its S/N is much smaller hence a much longer data acquisition time for each measurement point, that limited the measurement points from + 15 °C to - 60 °C, rather than + 20 °C to -70 °C used in <sup>1</sup>H experiments.

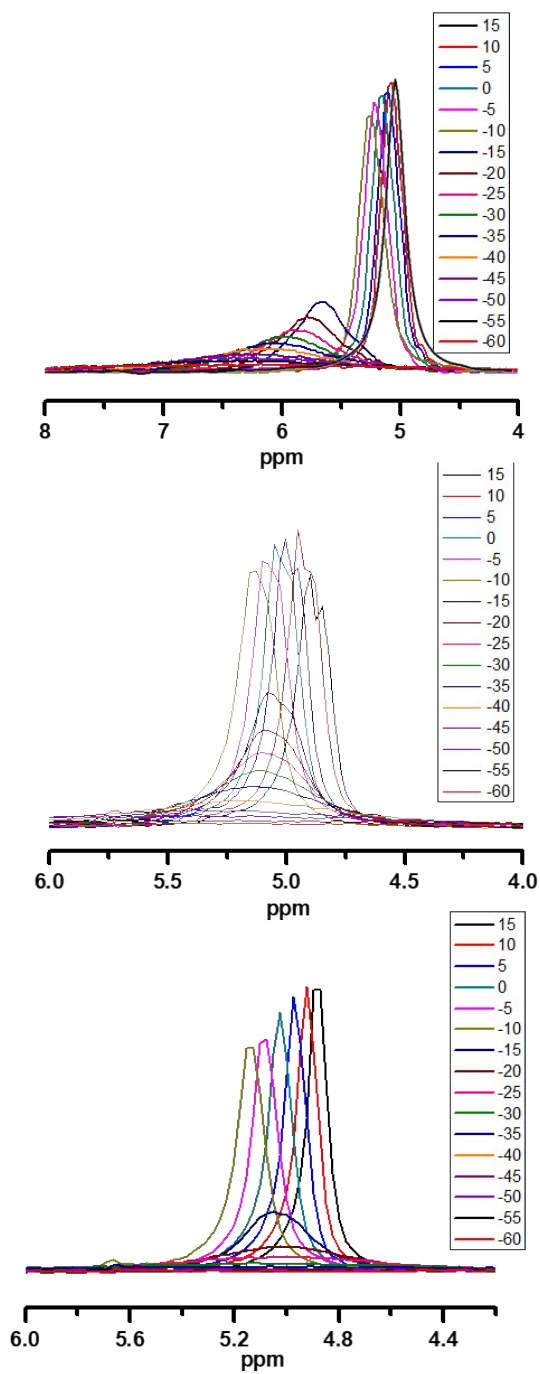

Figure S1 The broad variable temperature  $^2\text{H}$  spectra of  $\text{D}_2\text{O}$  in fully hydrated pristine Nafion samples and substituted with lithium and sodium, respectively.
